# Supplementary material for: Pseudoceratonic Acid and Moloka’iamine Derivatives from the Red Sea Verongiid Sponge Pseudoceratina arabica
Source: PubMed Central journal article supplement (PMC7690883; doi:10.3390/md18110525), 2020-10-23
Supplement: marinedrugs-18-00525-s001.pdf [file marinedrugs-18-00525-s001.pdf]

## Supplementary Information

|                                                                                                                  |     |
|------------------------------------------------------------------------------------------------------------------|-----|
| <b>Figure S1.</b> Positive HRESIMS of pseudoceratonic acid (1)                                                   | S1  |
| <b>Figure S2.</b> Negative HRESIMS of pseudoceratonic acid (1)                                                   | S1  |
| <b>Figure S3.</b> <sup>1</sup> H NMR spectrum of pseudoceratonic acid (1) (CD <sub>3</sub> OD)                   | S2  |
| <b>Figure S4.</b> <sup>13</sup> C NMR spectrum of pseudoceratonic acid (1) (CD <sub>3</sub> OD)                  | S2  |
| <b>Figure S5.</b> HSQC spectrum of pseudoceratonic acid (1) (CD <sub>3</sub> OD)                                 | S3  |
| <b>Figure S6.</b> <sup>1</sup> H- <sup>13</sup> C HMBC spectrum of pseudoceratonic acid (1) (CD <sub>3</sub> OD) | S3  |
| <b>Figure S7.</b> <sup>1</sup> H- <sup>15</sup> N HMBC spectrum of pseudoceratonic acid (1) (CD <sub>3</sub> OD) | S4  |
| <b>Figure S8.</b> LRESIMS and fragmentation ion peaks of pseudoceratonic acid (1)                                | S4  |
| <b>Figure S9.</b> Positive HRESIMS of ceratinine N (2)                                                           | S5  |
| <b>Figure S10.</b> <sup>1</sup> H NMR spectrum of ceratinine N (2) (CD <sub>3</sub> OD)                          | S5  |
| <b>Figure S11.</b> <sup>13</sup> C NMR spectrum of ceratinine N (2) (CD <sub>3</sub> OD)                         | S6  |
| <b>Figure S12.</b> DEPT spectrum of ceratinine N (2) (CD <sub>3</sub> OD)                                        | S6  |
| <b>Figure S13.</b> COSY spectrum of ceratinine N (2) (CD <sub>3</sub> OD)                                        | S7  |
| <b>Figure S14.</b> HSQC spectrum of ceratinine N (2) (CD <sub>3</sub> OD)                                        | S7  |
| <b>Figure S15.</b> HMBC spectrum of ceratinine N (2) (CD <sub>3</sub> OD)                                        | S8  |
| <b>Figure S16.</b> Positive HRESIMS of ceratinine O (3)                                                          | S8  |
| <b>Figure S17.</b> <sup>1</sup> H NMR spectrum of ceratinine O (3) (CD <sub>3</sub> OD)                          | S9  |
| <b>Figure S18.</b> <sup>13</sup> C NMR spectrum of ceratinine O (3) (CD <sub>3</sub> OD)                         | S9  |
| <b>Figure S19.</b> DEPT spectrum of ceratinine O (3) (CD <sub>3</sub> OD)                                        | S10 |
| <b>Figure S20.</b> COSY spectrum of ceratinine O (3) (CD <sub>3</sub> OD).                                       | S10 |
| <b>Figure S21.</b> HSQC spectrum of ceratinine O (3) (CD <sub>3</sub> OD)                                        | S11 |
| <b>Figure S22.</b> HMBC spectrum of ceratinine O (3) (CD <sub>3</sub> OD)                                        | S11 |

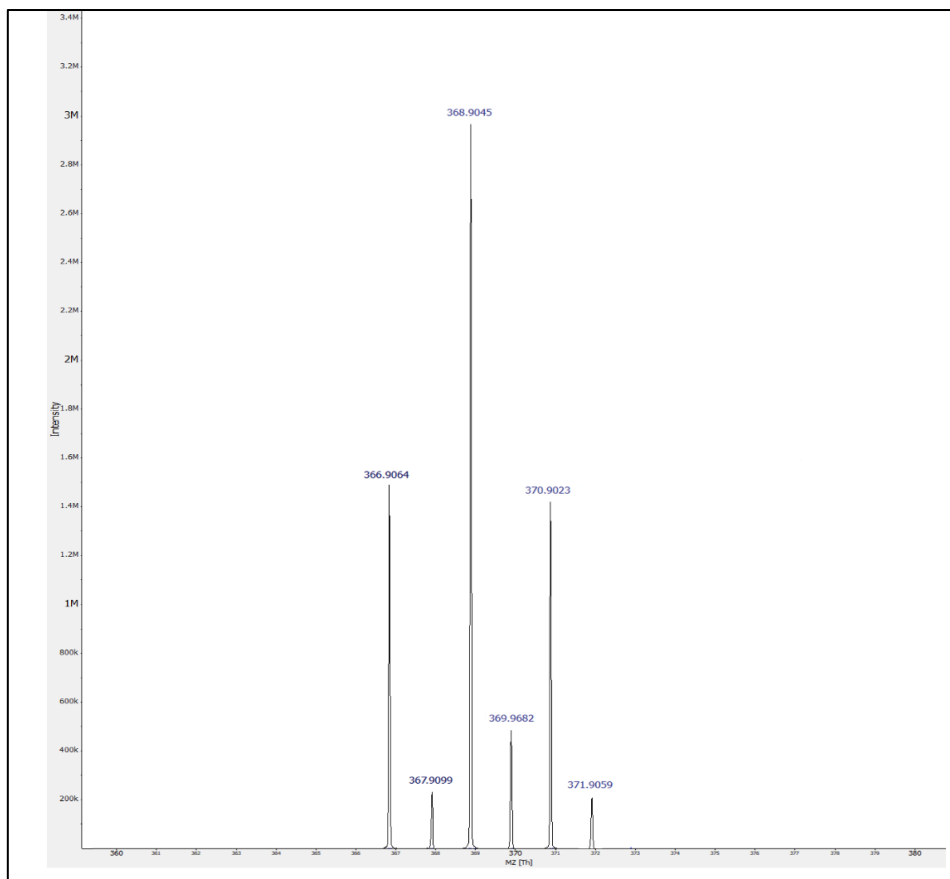

**Figure S1.** Positive HRESIMS of pseudoceratonic acid (1).

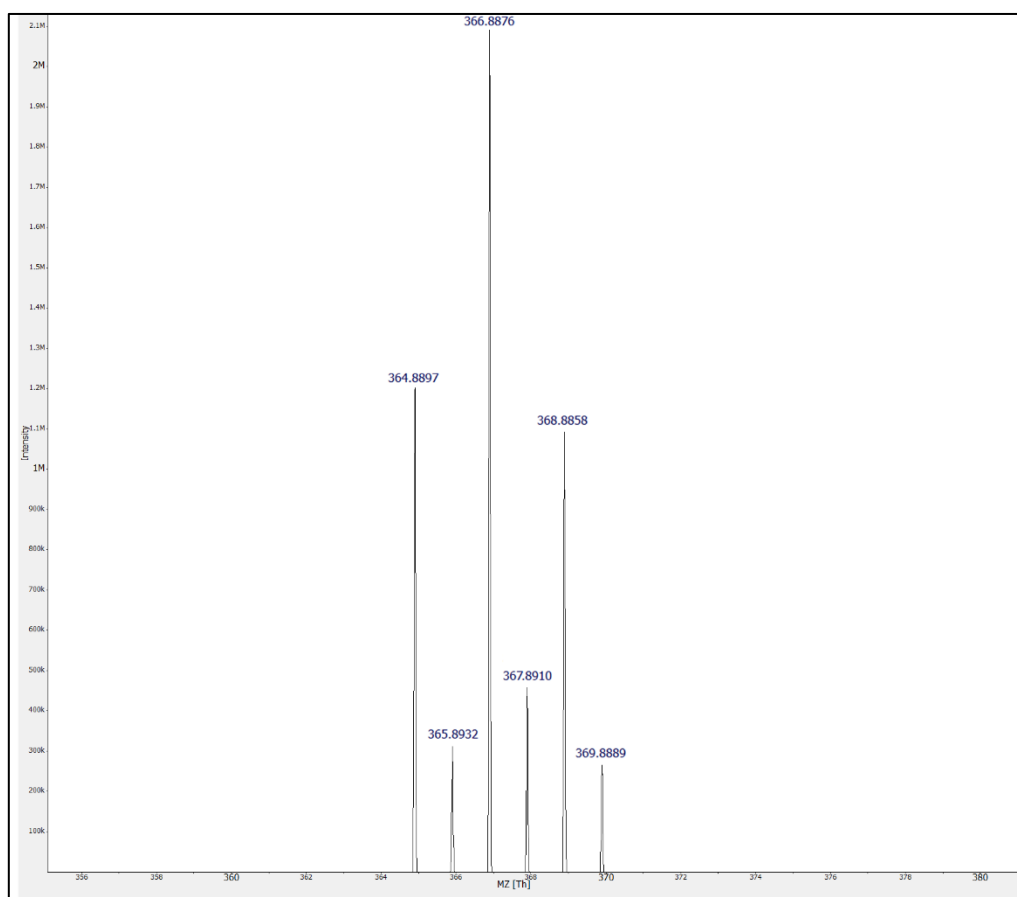

**Figure S2.** Negative HRESIMS of pseudoceratonic acid (1).

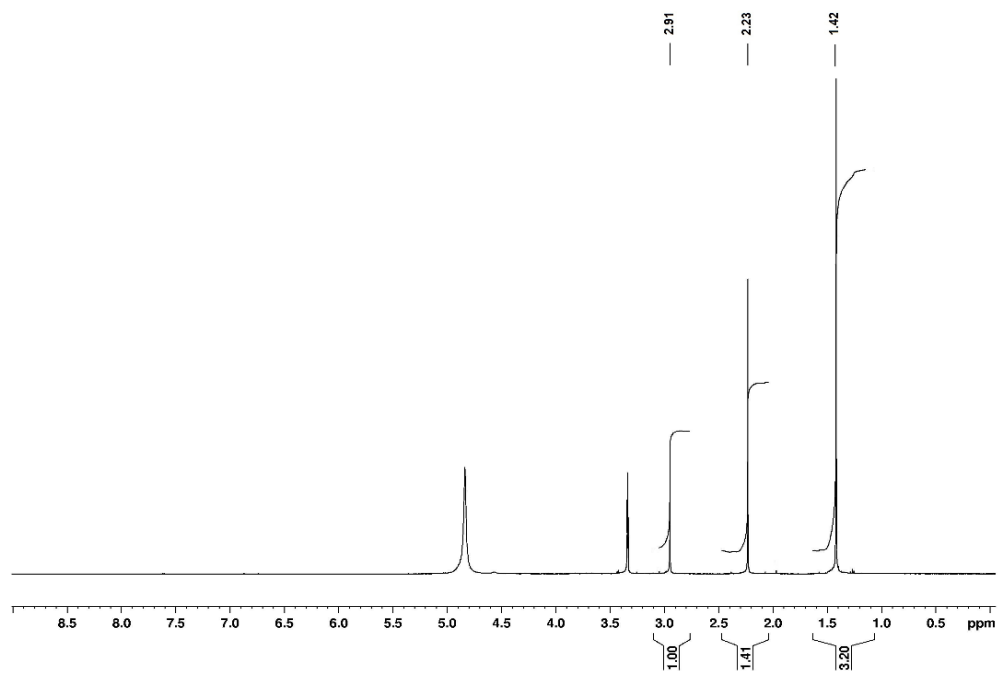

**Figure S3.**  $^1\text{H}$  NMR spectrum of pseudoceratonic acid (**1**) ( $\text{CD}_3\text{OD}$ ).

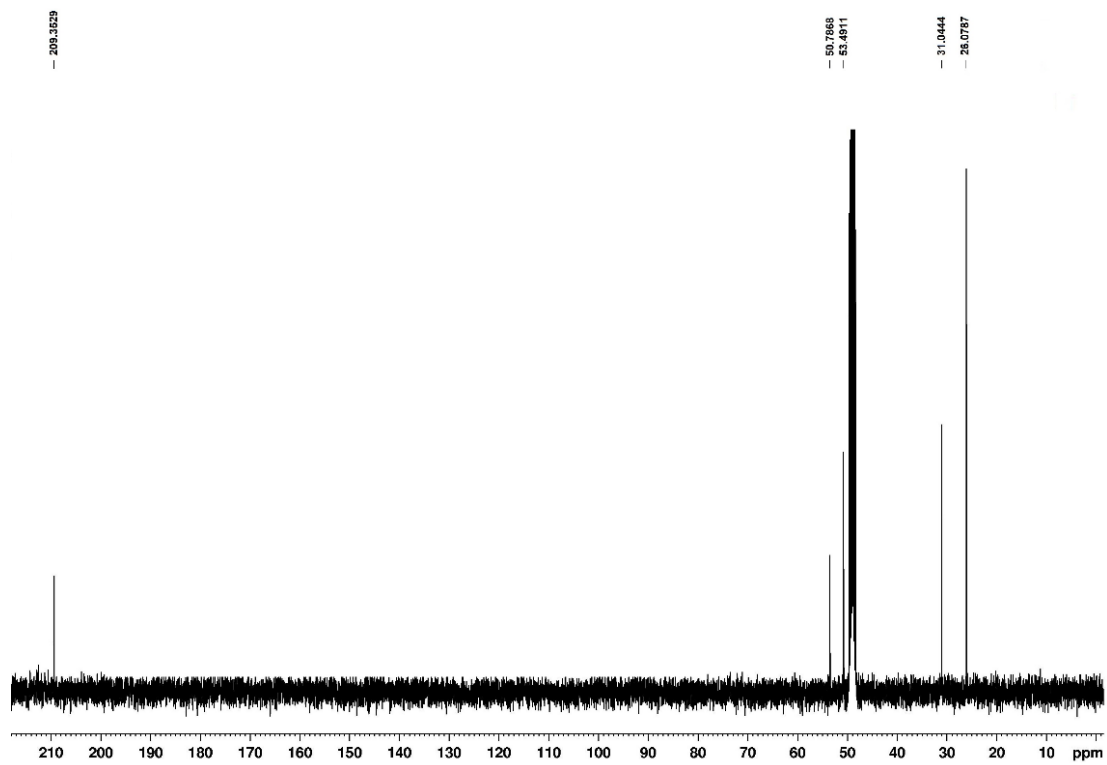

**Figure S4.**  $^{13}\text{C}$  NMR spectrum of pseudoceratonic acid (**1**) ( $\text{CD}_3\text{OD}$ ).

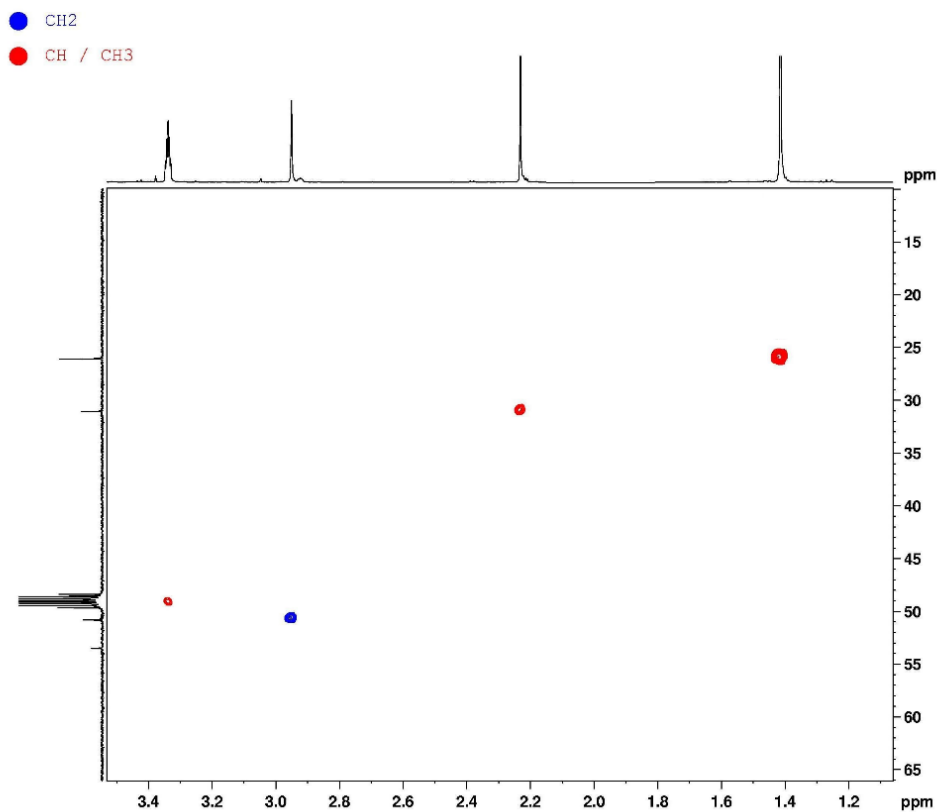

Figure S5. HSQC spectrum of pseudoceratonic acid (**1**) (CD<sub>3</sub>OD).

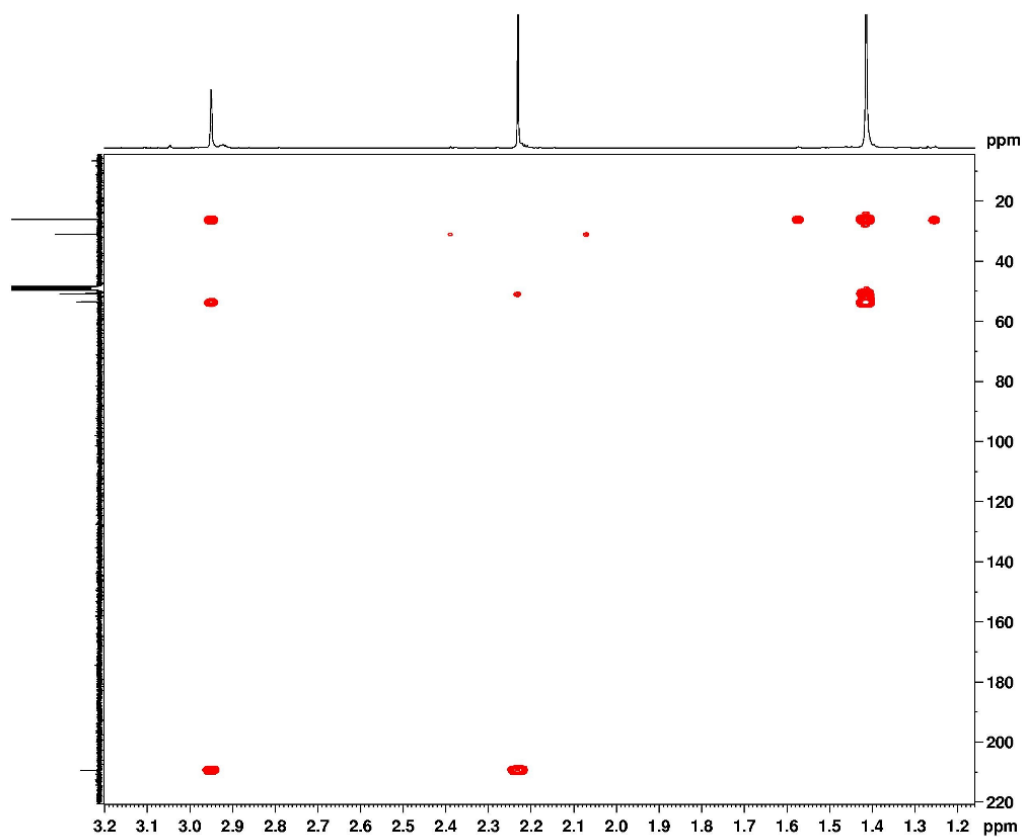

Figure S6. <sup>1</sup>H-<sup>13</sup>C HMBC spectrum of pseudoceratonic acid (**1**) (CD<sub>3</sub>OD).

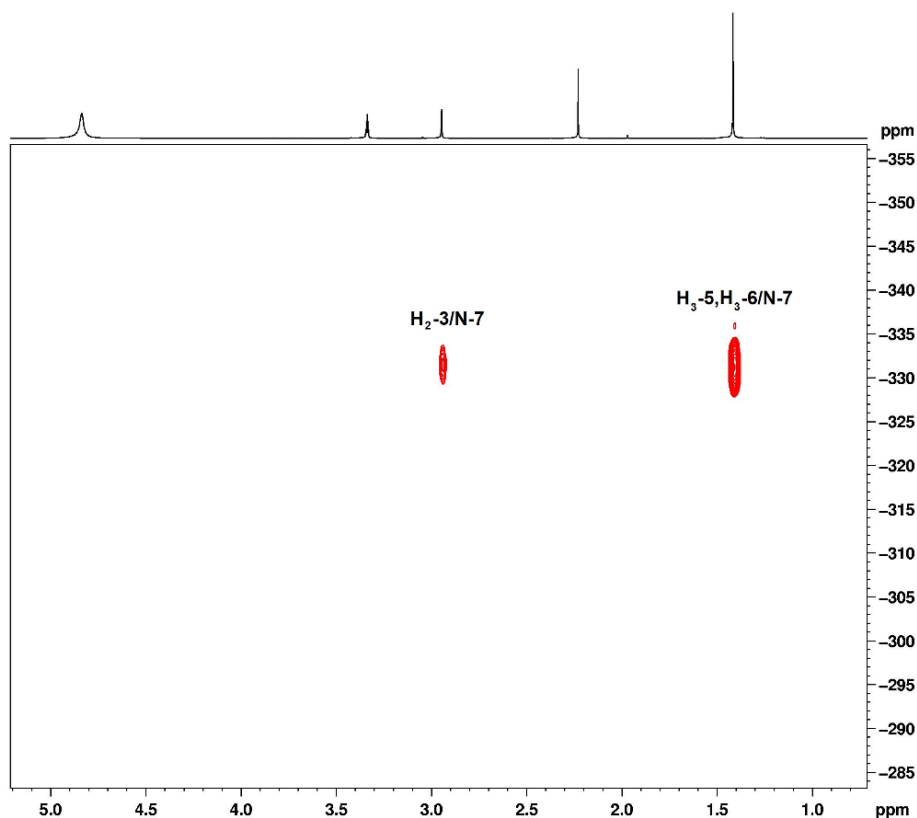

**Figure S7.**  $^1\text{H}$ - $^{15}\text{N}$  HMBC spectrum of pseudoceratonic acid (**1**) ( $\text{CD}_3\text{OD}$ ).

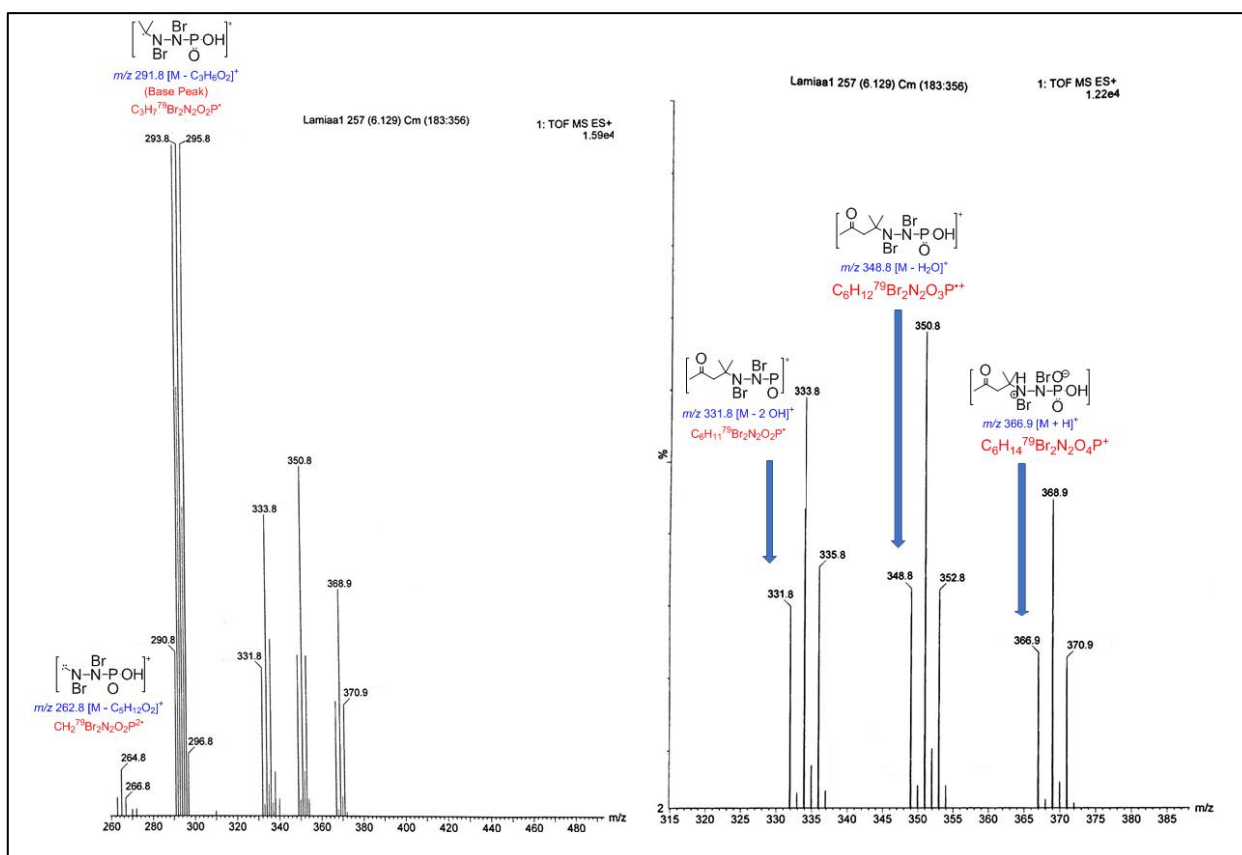

**Figure S8.** LRESIMS and fragmentation ion peaks of pseudoceratonic acid (**1**).

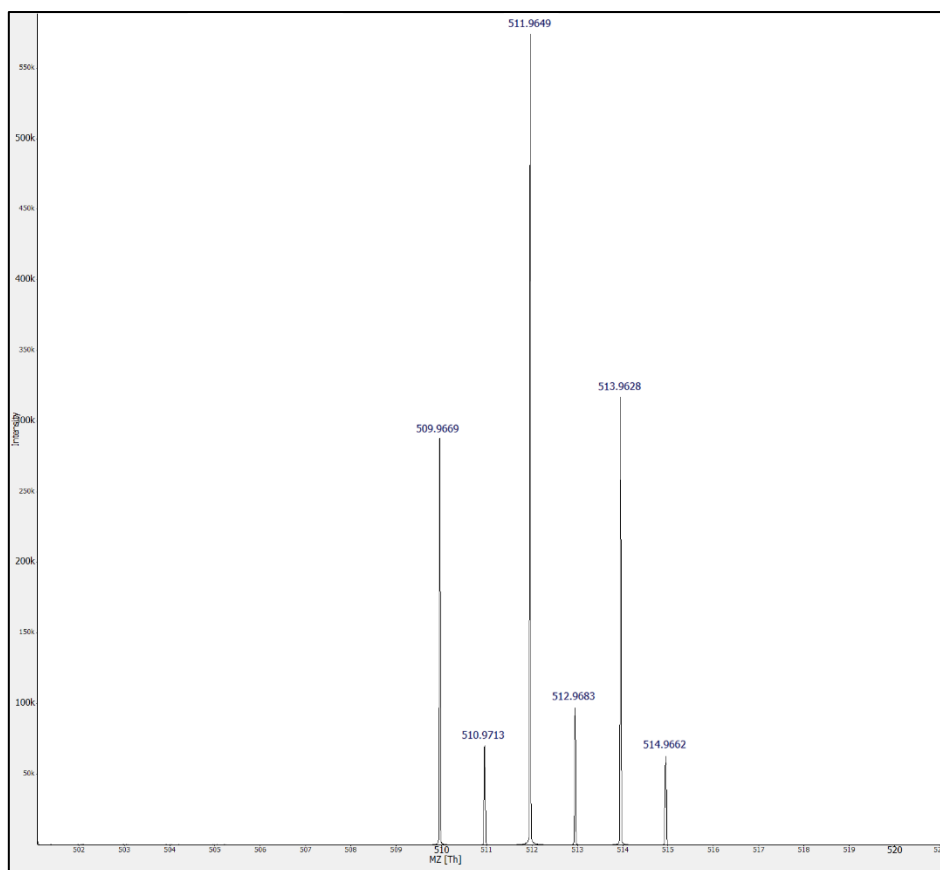

**Figure S9.** Positive HRESIMS of ceratinine N (**2**).

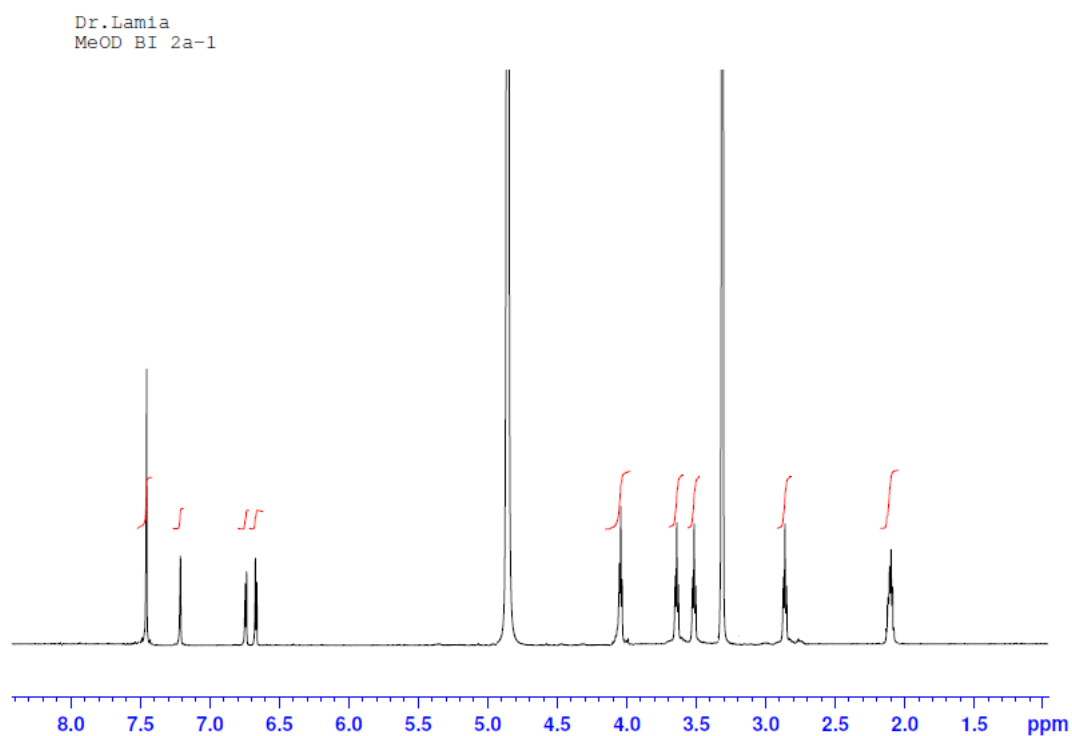

**Figure S10.**  $^1\text{H}$  NMR spectrum of ceratinine N (**2**) ( $\text{CD}_3\text{OD}$ ).

Dr.Lamia  
MeOD BI 2a-1

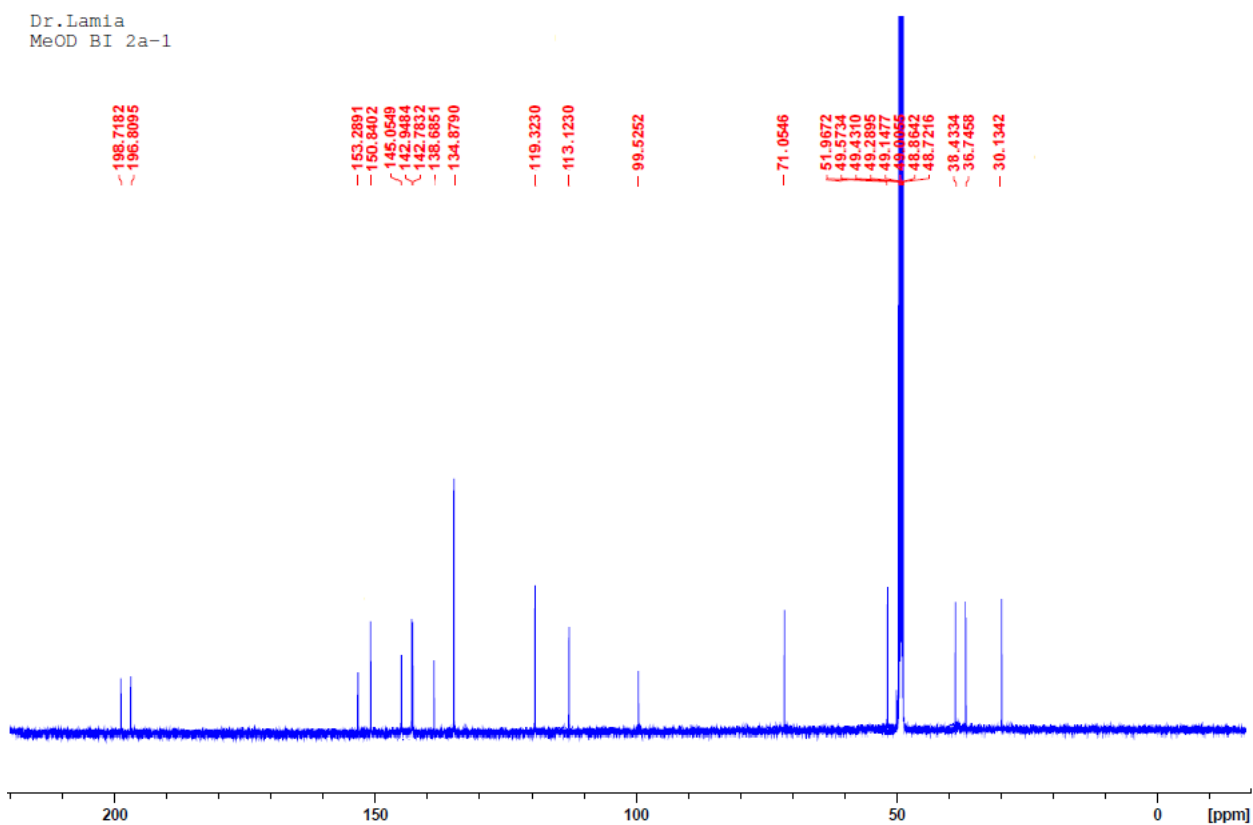

Figure S11.  $^{13}\text{H}$  NMR spectrum of ceratinine N (2) ( $\text{CD}_3\text{OD}$ ).

Dr.Lamia  
MeOD BI 2a-1

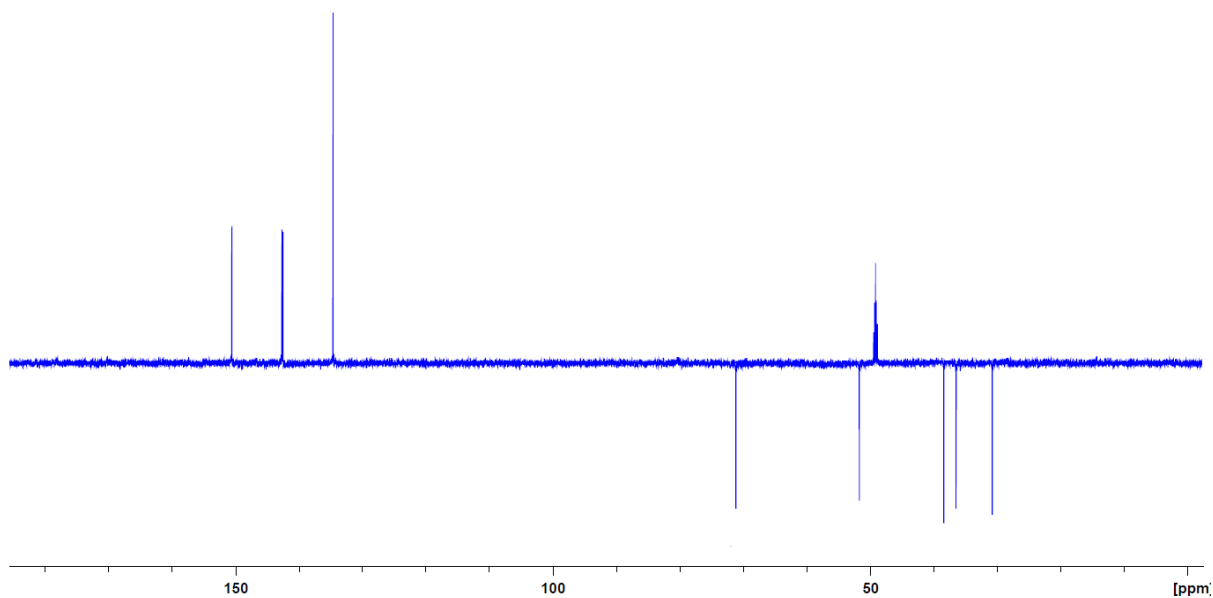

Figure S12. DEPT spectrum of ceratinine N (2) ( $\text{CD}_3\text{OD}$ ).

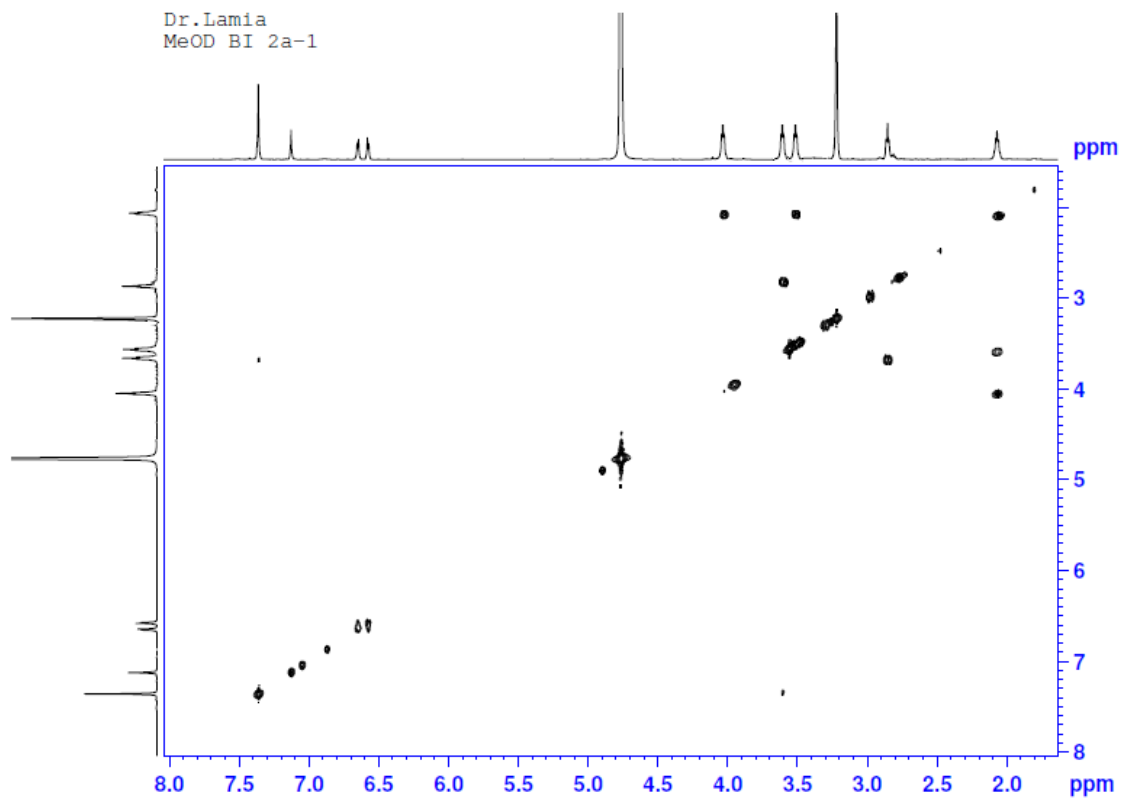

**Figure S13.** COSY spectrum of ceratinine N (2) ( $\text{CD}_3\text{OD}$ ).

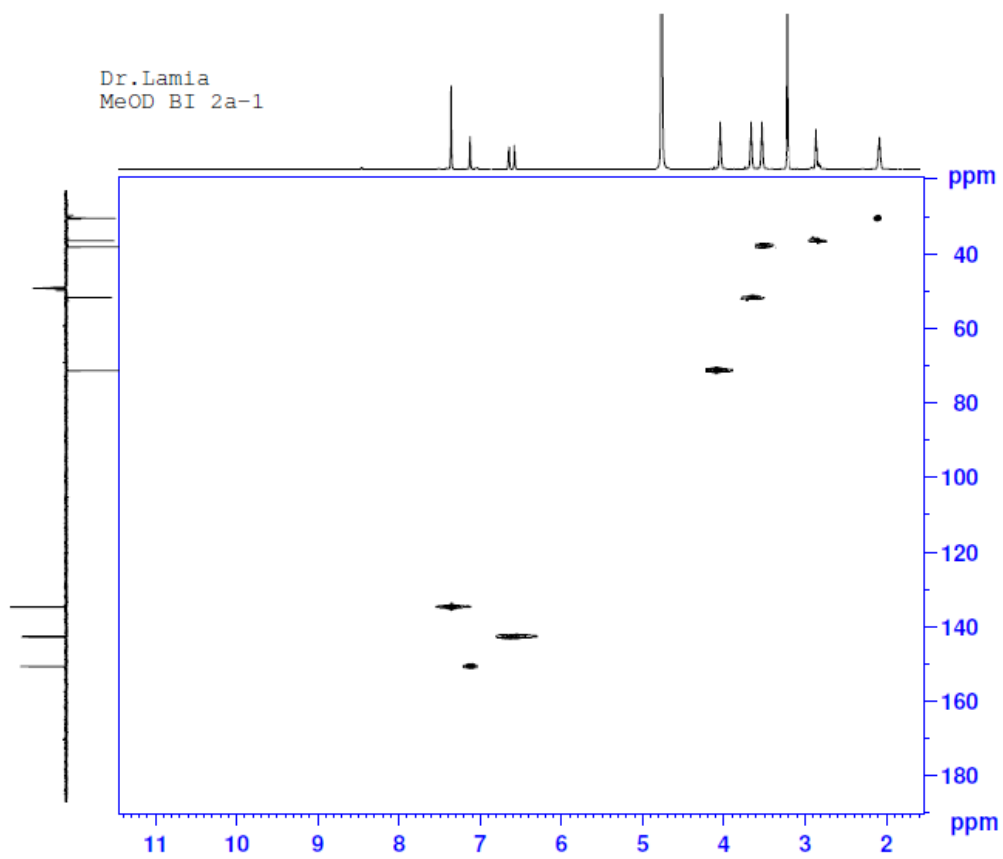

**Figure S14.** HSQC spectrum of ceratinine N (2) ( $\text{CD}_3\text{OD}$ ).



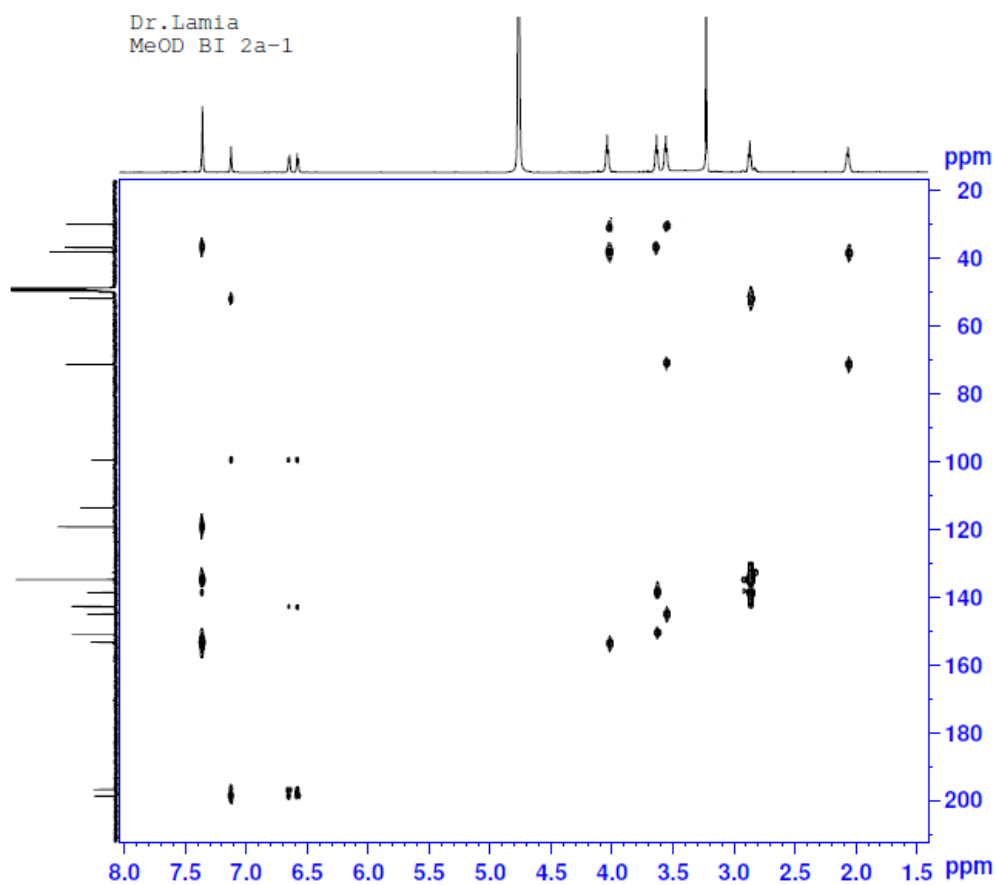

**Figure S15.** HMBC spectrum of ceratinine N (**2**) ( $\text{CD}_3\text{OD}$ ).

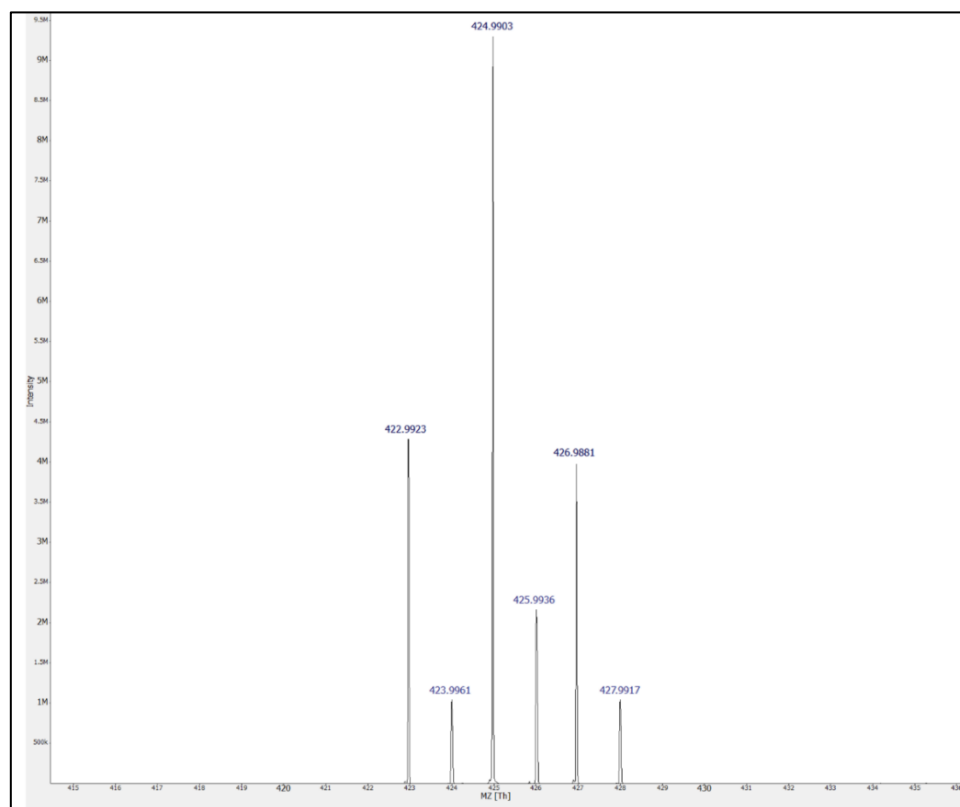

**Figure S16.** Positive HRESIMS of ceratinine O (**3**).

Dr.Lamia  
MeOD BI2a-7

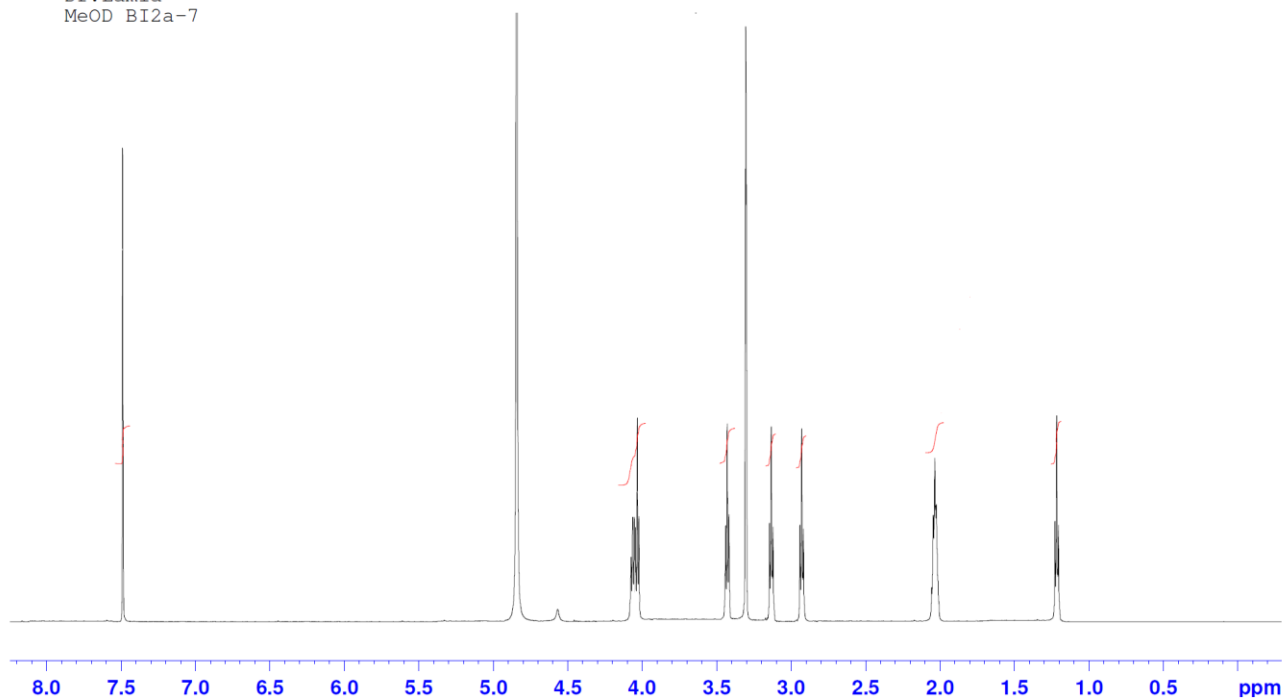

Figure S17.  $^1\text{H}$  NMR spectrum of ceratinine O (3) ( $\text{CD}_3\text{OD}$ ).

Dr.Lamia  
MeOD BI2a-7

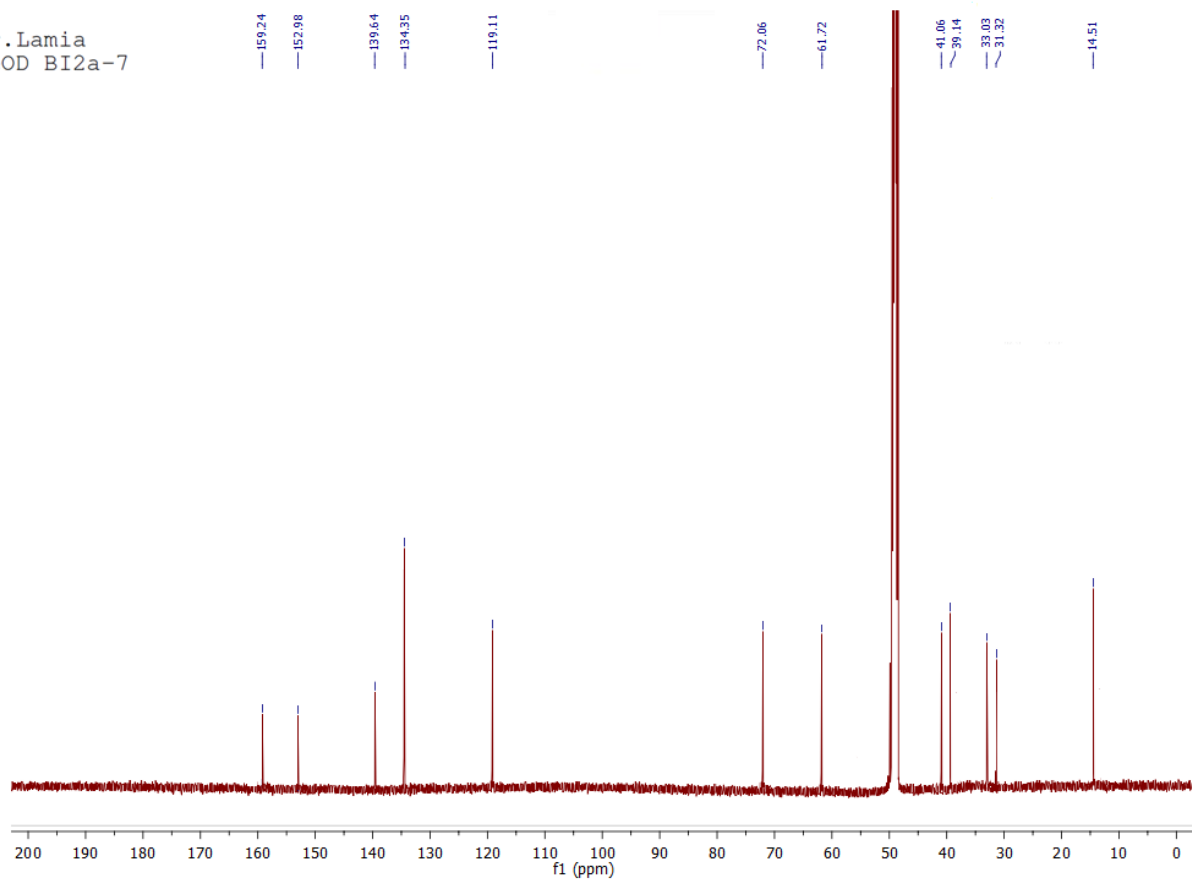

Figure S18.  $^{13}\text{C}$  NMR spectrum of ceratinine O (3) ( $\text{CD}_3\text{OD}$ ).

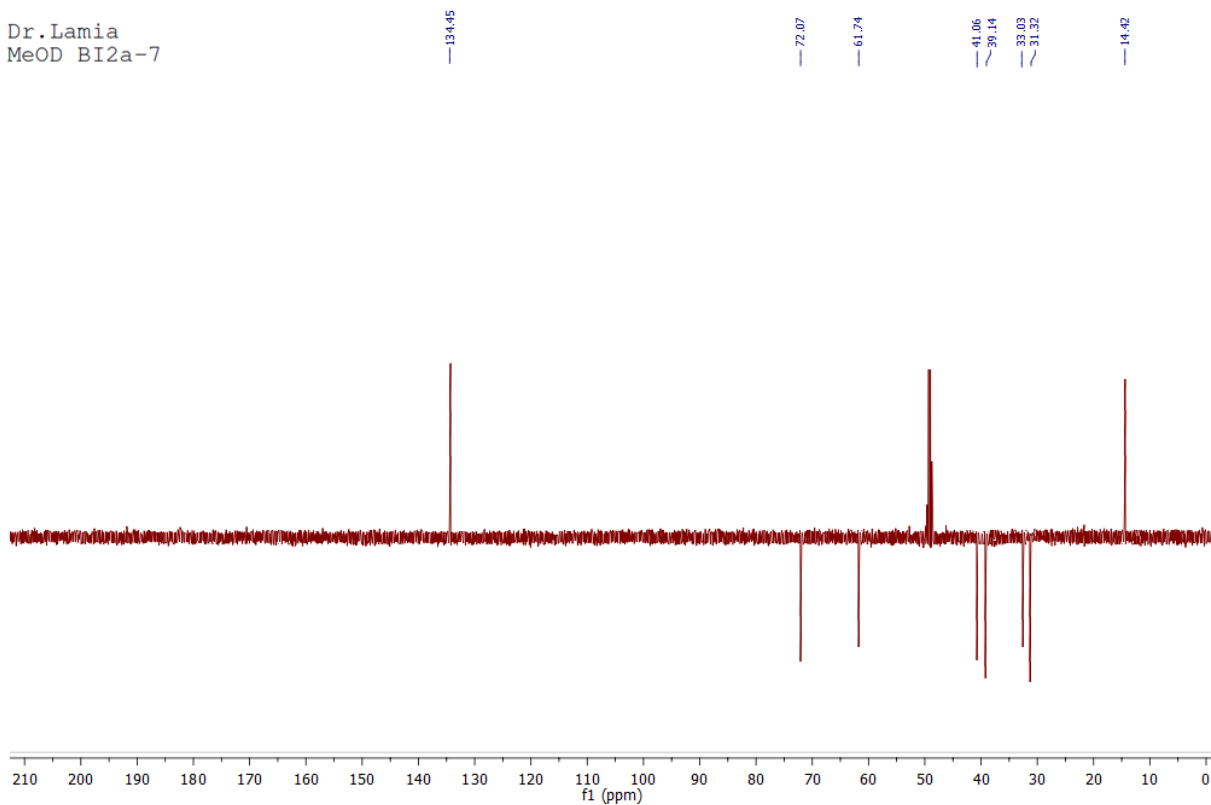

Figure S19. DEPT spectrum of ceratinine O (3) (CD<sub>3</sub>OD).

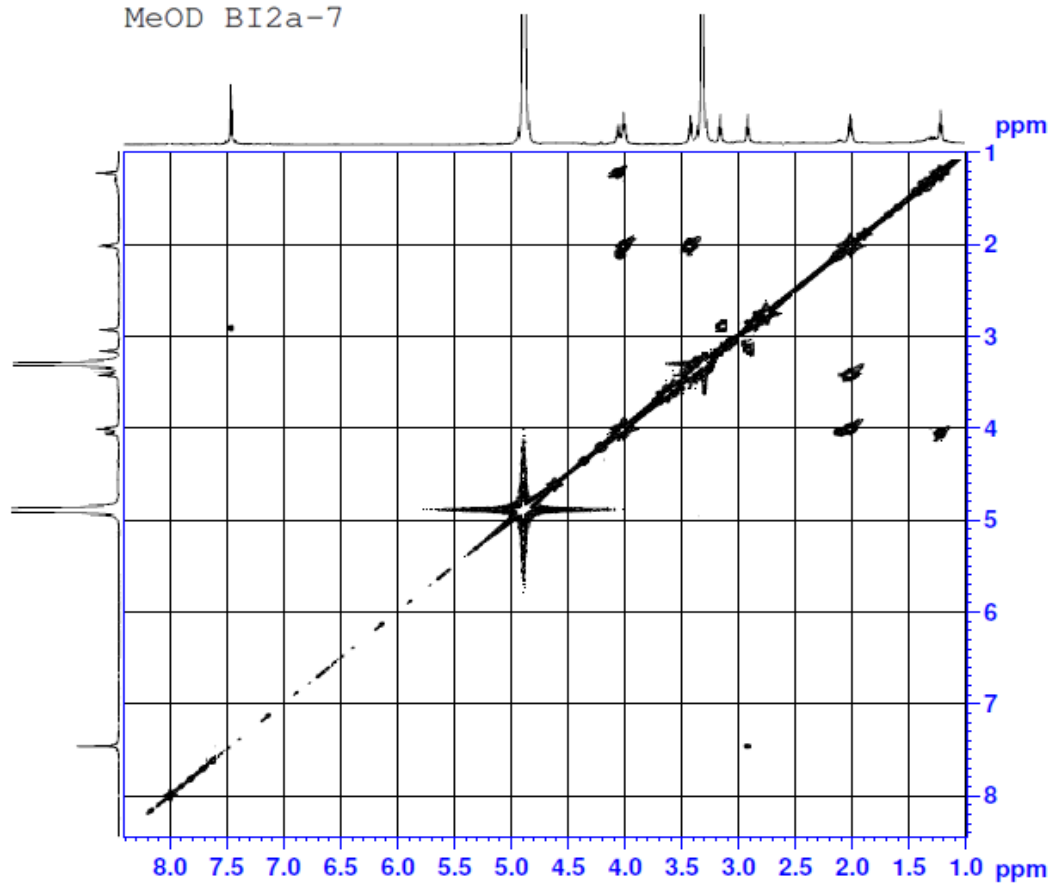

Figure S20. COSY spectrum of ceratinine O (3) (CD<sub>3</sub>OD).

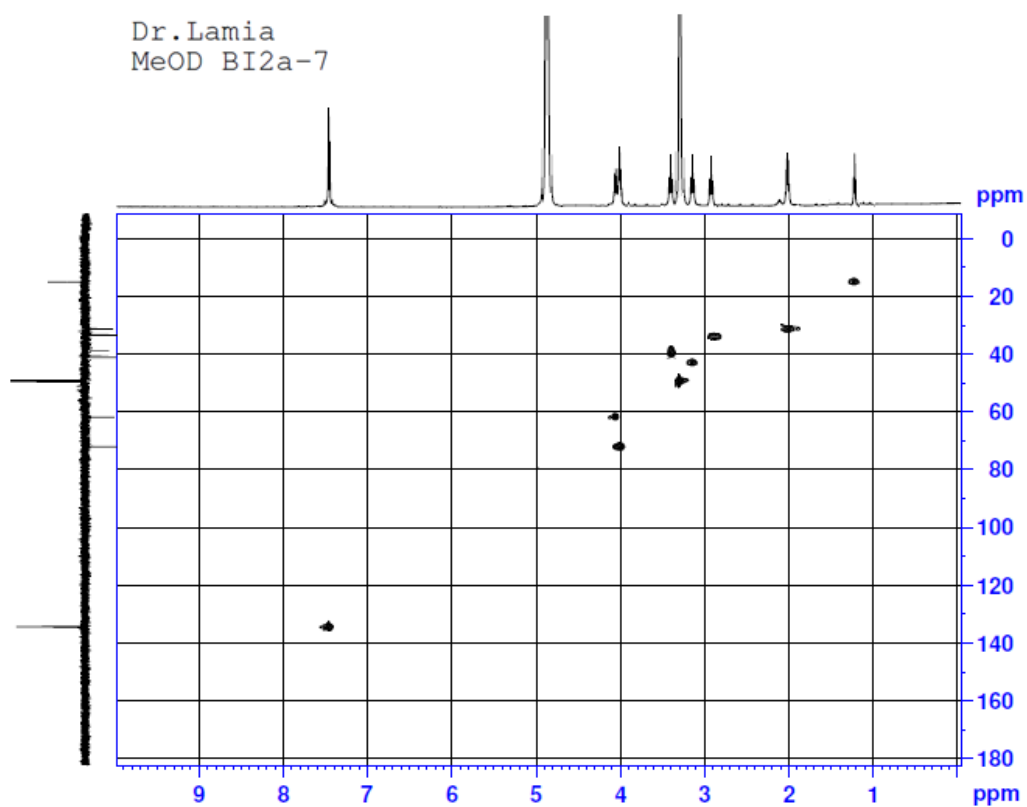

Figure S21. HSQC spectrum of ceratinine O (3) ( $\text{CD}_3\text{OD}$ ).

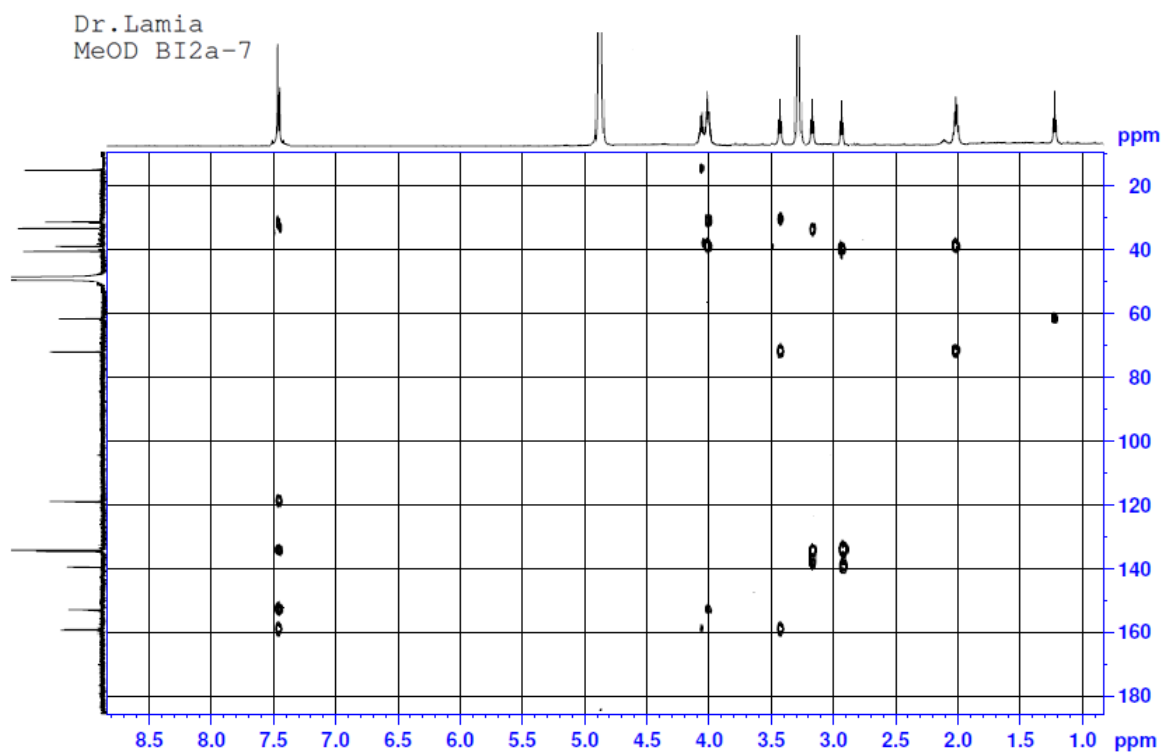

Figure S22. HMBC spectrum of ceratinine O (3) ( $\text{CD}_3\text{OD}$ ).
